# Supplementary material for: Pharmacokinetic Comparison between Methotrexate-Loaded Nanoparticles and Nanoemulsions as Hard- and Soft-Type Nanoformulations: A Population Pharmacokinetic Modeling Approach
Source: MDPI journal article supplement (doi:10.3390/pharmaceutics13071050), 2021-07-09
Supplement: s1 [file s1]

# Supplementary Materials: Pharmacokinetic Comparison Between Methotrexate-Loaded Nanoparticles and Nanoemulsions as Hard- and Soft-Type Nanoformulations: A Population Pharmacokinetic Modeling Approach

Seung-Hyun Jeong, Ji-Hun Jang and Yong-Bok Lee

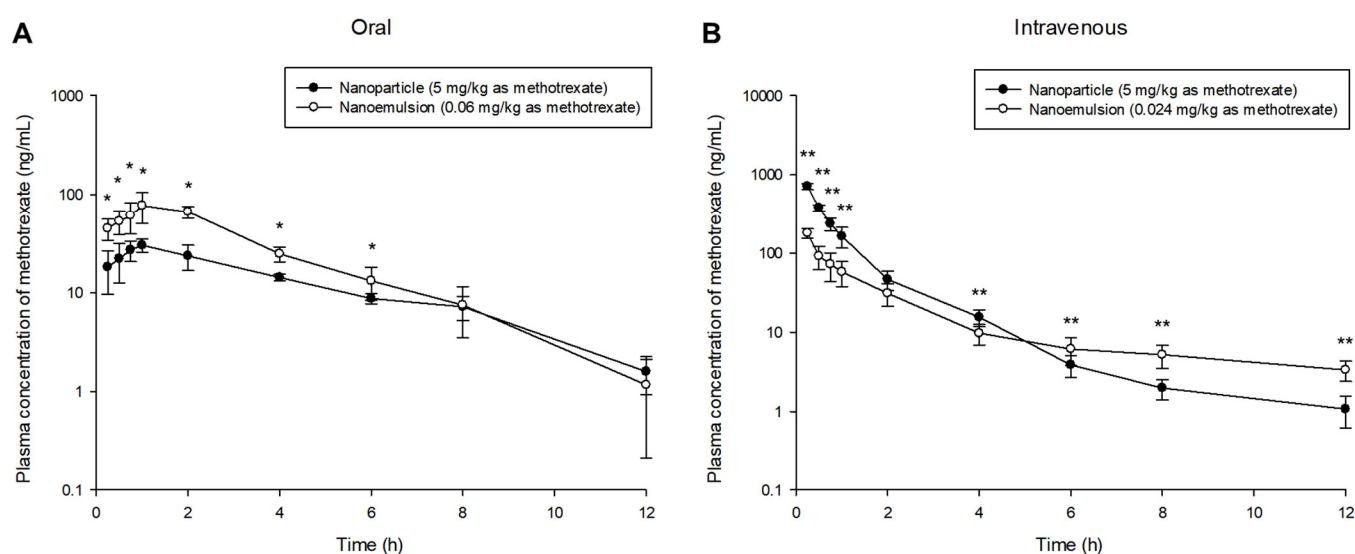

**Figure S1.** Mean plasma concentration-time profiles of methotrexate after oral (A) or intravenous (B) administration of methotrexate-loaded nanoparticles (●, 5 mg/kg as methotrexate) and methotrexate-loaded nanoemulsions (○, 0.06 or 0.024 mg/kg as methotrexate) in rats. Vertical bars represent standard deviation of the mean ( $n = 5$ ). \*  $p < 0.05$  compared with the oral administration of nanoparticle. \*\*  $p < 0.05$  compared with the intravenous administration of nanoparticle.

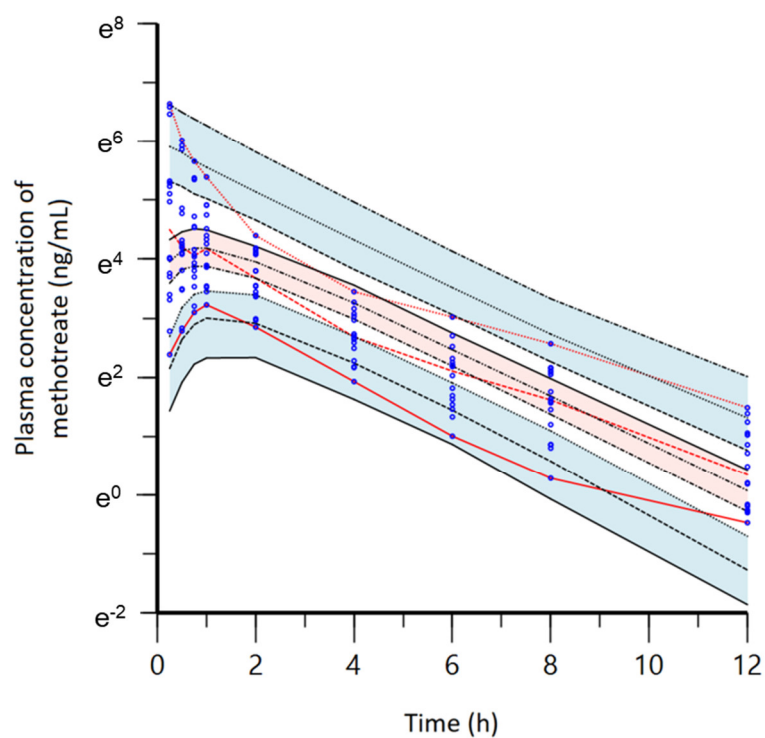

**Figure S2.** Visual predictive check of the final model for methotrexate-loaded nanoformulations (including nanoparticles and nanoemulsions). Observed concentrations are depicted by dots. Black dashed lines indicate the 95<sup>th</sup>, 50<sup>th</sup>, and 5<sup>th</sup> percentiles of predicted concentrations. Blue shaded regions (with black boundary lines) indicate 95% confidence intervals for the predicted 5<sup>th</sup> and 95<sup>th</sup> percentiles. Red shaded regions indicate 95% confidence intervals for the predicted 50<sup>th</sup> percentiles. Red lines indicate the 95<sup>th</sup>, 50<sup>th</sup>, and 5<sup>th</sup> percentiles of observed concentrations.
